# Supplementary material for: Circulating Tumor DNA Profiling of a Diffuse Large B Cell Lymphoma Patient with Secondary Acute Myeloid Leukemia
Source: Cancers (Basel). 2022 Mar 8;14(6):1371. doi: 10.3390/cancers14061371 (PMC8946858; doi:10.3390/cancers14061371)
Supplement: Supplementary file 1 [file cancers-14-01371-s001.zip › Supplemental Table S2 - Genes and regions targeted in the Avenio Expanded Kit.xlsx]

## Sheet: Sheet1
Number	GeneSymbol	SeqTarget	GeneName	Cytoband	Chrom	Start	End
1	ABL1	Selected Regions	ABL proto-oncogene 1, non-receptor tyrosine kinase	9q34.1	9	130835254	130887675
2	AKT1	Selected Regions	AKT serine/threonine kinase 1	14q32.32	14	104769349	104795743
3	AKT2	Selected Regions	AKT serine/threonine kinase 2	19q13.1-q13.2	19	40230316	40285395
4	ALK	Selected Regions	anaplastic lymphoma receptor tyrosine kinase	2p23	2	29192773	29921611
5	APC	Selected Regions	APC, WNT signaling pathway regulator	5q22.2	5	112737858	112846239
6	AR	All Coding Regions	androgen receptor	Xq12	X	67544031	67730619
7	ARAF	Selected Regions	A-Raf proto-oncogene, serine/threonine kinase	Xp11.4-p11.2	X	47561099	47565974
8	BRAF	Selected Regions	B-Raf proto-oncogene, serine/threonine kinase	7q34	7	140734012	140924764
9	BRCA1	All Coding Regions	BRCA1, DNA repair associated	17q21	17	43044294	43125323
10	BRCA2	All Coding Regions	BRCA2, DNA repair associated	13q12.3	13	32315479	32399672
11	CCND1	All Coding Regions	cyclin D1	11q13	11	69641104	69654474
12	CCND2	All Coding Regions	cyclin D2	12p13	12	4273735	4305356
13	CCND3	All Coding Regions	cyclin D3	6p21	6	41934932	41941848
14	CD274	All Coding Regions	CD274 molecule	9p24	9	5450502	5470567
15	CDK4	All Coding Regions	cyclin dependent kinase 4	12q14	12	57747726	57752447
16	CDK6	Selected Regions	cyclin dependent kinase 6	7q21-q22	7	92604920	92833917
17	CDKN2A	All Coding Regions	cyclin dependent kinase inhibitor 2A	9p21	9	21967751	21974827
18	CSF1R	Selected Regions	colony stimulating factor 1 receptor	5q32	5	150053290	150113372
19	CTNNB1	Selected Regions	catenin beta 1	3p21	3	41199423	41240453
20	DDR2	Selected Regions	discoidin domain receptor tyrosine kinase 2	1q23.3	1	162632437	162780457
21	DPYD	Selected Regions	dihydropyrimidine dehydrogenase	1p22	1	97077743	97921059
22	EGFR	All Coding Regions	epidermal growth factor receptor	7p12	7	55019031	55168635
23	ERBB2	All Coding Regions	erb-b2 receptor tyrosine kinase 2	17q12	17	39699977	39728662
24	ESR1	All Coding Regions	estrogen receptor 1	6q25.1	6	151807678	152103273
25	EZH2	Selected Regions	enhancer of zeste 2 polycomb repressive complex 2 subunit	7q35-q36	7	148807371	148884349
26	FBXW7	All Coding Regions	F-box and WD repeat domain containing 7	4q31.3	4	152321257	152382512
27	FGFR1	Selected Regions	fibroblast growth factor receptor 1	8p11.23-p11.22	8	38411137	38468834
28	FGFR2	Selected Regions	fibroblast growth factor receptor 2	10q26	10	121478329	121598458
29	FGFR3	Selected Regions	fibroblast growth factor receptor 3	4p16.3	4	1793311	1808872
30	FLT1	Selected Regions	fms related tyrosine kinase 1	13q12	13	28300345	28495128
31	FLT3	Selected Regions	fms related tyrosine kinase 3	13q12	13	28003273	28100592
32	FLT4	Selected Regions	fms related tyrosine kinase 4	5q35.3	5	180601505	180649624
33	GATA3	Selected Regions	GATA binding protein 3	10p15	10	8054703	8075201
34	GNA11	Selected Regions	G protein subunit alpha 11	19p13.3	19	3094409	3124002
35	GNAQ	Selected Regions	G protein subunit alpha q	9q21	9	77716273	78031449
36	GNAS	Selected Regions	GNAS complex locus	20q13.3	20	58839717	58911196
37	IDH1	Selected Regions	isocitrate dehydrogenase (NADP(+)) 1, cytosolic	2q33.3	2	208236226	208254303
38	IDH2	Selected Regions	isocitrate dehydrogenase (NADP(+)) 2, mitochondrial	15q26.1	15	90083979	90102554
39	JAK2	Selected Regions	Janus kinase 2	9p24	9	4985085	5128183
40	JAK3	Selected Regions	Janus kinase 3	19p13.1	19	17824783	17848032
41	KDR	Selected Regions	kinase insert domain receptor	4q11-q12	4	55078258	55125595
42	KEAP1	All Coding Regions	kelch like ECH associated protein 1	19p13.2	19	10486119	10502805
43	KIT	Selected Regions	KIT proto-oncogene receptor tyrosine kinase	4q12	4	54657927	54740715
44	KRAS	All Coding Regions	KRAS proto-oncogene, GTPase	12p12.1	12	25204788	25250931
45	MAP2K1	Selected Regions	mitogen-activated protein kinase kinase 1	15q22.1-q22.33	15	66386872	66491544
46	MAP2K2	Selected Regions	mitogen-activated protein kinase kinase 2	19p13.3	19	4090321	4124129
47	MET	All Coding Regions	MET proto-oncogene, receptor tyrosine kinase	7q31	7	116672358	116798386
48	MLH1	All Coding Regions	mutL homolog 1	3p21.3	3	36993349	37050846
49	MSH2	All Coding Regions	mutS homolog 2	2p21	2	47403066	47483228
50	MSH6	All Coding Regions	mutS homolog 6	2p16	2	47783081	47806953
51	MTOR	Selected Regions	mechanistic target of rapamycin	1p36.2	1	11106530	11262551
52	NF2	All Coding Regions	neurofibromin 2	22q12.2	22	29603555	29683915
53	NFE2L2	Selected Regions	nuclear factor, erythroid 2 like 2	2q31	2	177230302	177264131
54	NRAS	Selected Regions	neuroblastoma RAS viral oncogene homolog	1p13.2	1	114704463	114716894
55	NTRK1	Selected Regions	neurotrophic receptor tyrosine kinase 1	1q21-q22	1	156815749	156881850
56	PDCD1LG2	All Coding Regions	programmed cell death 1 ligand 2	9p24.2	9	5510544	5571282
57	PDGFRA	Selected Regions	platelet derived growth factor receptor alpha	4q12	4	54229096	54298245
58	PDGFRB	Selected Regions	platelet derived growth factor receptor beta	5q33.1	5	150113838	150155859
59	PIK3CA	Selected Regions	phosphatidylinositol-4,5-bisphosphate 3-kinase catalytic subunit alpha	3q26.3	3	179148522	179240093
60	PIK3R1	Selected Regions	phosphoinositide-3-kinase regulatory subunit 1	5q13.1	5	68290638	68301821
61	PMS2	All Coding Regions	PMS1 homolog 2, mismatch repair system component	7p22.2	7	5970925	6009106
62	PTCH1	Selected Regions	patched 1	9q22.3	9	95442981	95508549
63	PTEN	All Coding Regions	phosphatase and tensin homolog	10q23.3	10	87863437	87971930
64	RAF1	Selected Regions	Raf-1 proto-oncogene, serine/threonine kinase	3p25	3	12583600	12664201
65	RB1	All Coding Regions	RB transcriptional corepressor 1	13q14.2	13	48303746	48481890
66	RET	Selected Regions	ret proto-oncogene	10q11.2	10	43077068	43130349
67	RNF43	Selected Regions	ring finger protein 43	17q22	17	58352499	58417582
68	ROS1	Selected Regions	ROS proto-oncogene 1, receptor tyrosine kinase	6q22	6	117288366	117425855
69	SMAD4	All Coding Regions	SMAD family member 4	18q21.1	18	51030212	51085041
70	SMO	All Coding Regions	smoothened, frizzled class receptor	7q32.3	7	129188871	129213544
71	STK11	All Coding Regions	serine/threonine kinase 11	19p13.3	19	1205798	1228435
72	TERT	Selected Regions	telomerase reverse transcriptase	5p15.33	5	1253171	1295047
73	TP53	All Coding Regions	tumor protein p53	17p13.1	17	7668401	7687550
74	TSC1	Selected Regions	tuberous sclerosis 1	9q34	9	132891347	132944633
75	TSC2	Selected Regions	tuberous sclerosis 2	16p13.3	16	2047894	2088720
76	UGT1A1	Selected Regions	UDP glucuronosyltransferase family 1 member A1	2q37	2	233760272	233773299
77	VHL	All Coding Regions	von Hippel-Lindau tumor suppressor	3p25.3	3	10141634	10153670
